# Supplementary material for: Environmental Characteristics Associated with Older Adults’ Social Participation: The Contribution of Sociodemography and Transportation in Metropolitan, Urban, and Rural Areas
Source: Int J Environ Res Public Health. 2020 Nov 13;17(22):8399. doi: 10.3390/ijerph17228399 (PMC7697474; doi:10.3390/ijerph17228399)
Supplement: Supplementary file 1 [file ijerph-17-08399-s001.pdf]

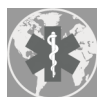

Article

# Environmental characteristics associated with older adults' social participation: the contribution of sociodemography and transportation in metropolitan, urban and rural areas

Table S1. Environmental characteristics classified according to ICF domains

| Characteristics                                                                                   | Collection scale | Analysis scale           | Source | Variable scale | Mean (SD) <sup>a</sup> | Min <sup>a</sup> | Max <sup>a</sup> |
|---------------------------------------------------------------------------------------------------|------------------|--------------------------|--------|----------------|------------------------|------------------|------------------|
| <b>PRODUCTS AND TECHNOLOGY</b>                                                                    |                  |                          |        |                |                        |                  |                  |
| <b>e120 - Products and technology for personal indoor and outdoor mobility and transportation</b> |                  |                          |        |                |                        |                  |                  |
| Subsidized Home Adaptations                                                                       | CSD              | CSD (1,260)              | 1      | Discrete       | 0.5 (1.6)              | 0                | 21               |
| <b>e140 - Products and technology for culture, recreation and sport</b>                           |                  |                          |        |                |                        |                  |                  |
| Sports centers <sup>b</sup>                                                                       | DA               | DA (13,776); CSD (1,320) | 2      | Discrete       | 0.0 (0.2)              | 0                | 2                |
| Cultural centers <sup>b</sup>                                                                     | DA               | DA (13,776); CSD (1,320) | 2      | Discrete       | 0.0 (0.2)              | 0                | 6                |
| <b>e145 - Products and technology for the practice of religion and spirituality</b>               |                  |                          |        |                |                        |                  |                  |
| Churches                                                                                          | DA               | DA (13,776)              | 2      | Discrete       | 0.2 (0.8)              | 0                | 63               |
| Optometrists <sup>b</sup>                                                                         | DA               | DA (13,776); CSD (1,320) | 2      | Discrete       | 0.1 (0.5)              | 0                | 31               |
| Drugstores                                                                                        | DA               | DA (13,776)              | 2      | Discrete       | 0.1 (0.4)              | 0                | 21               |
| <b>e160 - Products and technology of land development</b>                                         |                  |                          |        |                |                        |                  |                  |
| Land use diversity                                                                                | DA               | DA (13,394)              | 3      | Continuous     | 0.3 (0.1)              | 0.0              | 0.8              |
| Banks                                                                                             | DA               | DA (13,776)              | 2      | Discrete       | 0.2 (1.1)              | 0                | 76               |
| Libraries <sup>b</sup>                                                                            | DA               | DA (13,776); CSD (1,320) | 2      | Discrete       | 0.0 (0.1)              | 0                | 7                |
| Coffee shops                                                                                      | DA               | DA (13,776)              | 2      | Discrete       | 0.1 (0.8)              | 0                | 51               |
| Shopping centers <sup>b</sup>                                                                     | DA               | DA (13,776); CSD (1,320) | 2      | Discrete       | 0.0 (0.3)              | 0                | 12               |
| Convenience stores                                                                                | DA               | DA (13,776)              | 2      | Discrete       | 0.2 (0.6)              | 0                | 40               |
| Grocery stores                                                                                    | DA               | DA (13,776)              | 2      | Discrete       | 0.2 (0.7)              | 0                | 50               |

|                                                                  |         |                          |   |            |             |       |      |
|------------------------------------------------------------------|---------|--------------------------|---|------------|-------------|-------|------|
| Hotels <sup>b</sup>                                              | DA      | DA (13,776); CSD (1,320) | 2 | Discrete   | 0.1 (0.5)   | 0     | 23   |
| Hardware stores <sup>b</sup>                                     | DA      | DA (13,776); CSD (1,320) | 2 | Discrete   | 0.1 (0.3)   | 0     | 4    |
| Restaurants                                                      | DA      | DA (13,776)              | 2 | Discrete   | 1.0 (3.7)   | 0     | 272  |
| Hair salons                                                      | DA      | DA (13,776)              | 2 | Discrete   | 0.6 (1.5)   | 0     | 101  |
| Gas stations                                                     | DA      | DA (13,776)              | 2 | Discrete   | 0.1 (0.4)   | 0     | 8    |
| <b>NATURAL ENVIRONMENT AND HUMAN-MADE CHANGES TO ENVIRONMENT</b> |         |                          |   |            |             |       |      |
| <b>e215 - Population</b>                                         |         |                          |   |            |             |       |      |
| Population aged 65 and over (%)                                  | DA, CSD | DA (13,776); CSD (1,320) | 4 | Continuous | 0.1 (0.1)   | 0     | 1.0  |
| Population concentration (Pop65 DA / pop65 CSD)                  | DA, CSD | DA (13,776)              | 4 | Continuous | 0.1 (0.2)   | 0     | 1.0  |
| Material deprivation index [1]                                   | DA      | DA (10,178)              | 5 | Continuous | 0.0 (0.0)   | -0.1  | 0.2  |
| Social deprivation index [1]                                     | DA      | DA (10,178)              | 5 | Continuous | 0.0 (0.0)   | -0.1  | 0.1  |
| <b>e220 - Flora and fauna</b>                                    |         |                          |   |            |             |       |      |
| Greenness (Mean of greenest pixel values 100x100m)               | PC      | DA (6,657)               | 6 | Continuous | 0.5 (0.1)   | 0.2   | 0.8  |
| <b>e225 - Climate</b>                                            |         |                          |   |            |             |       |      |
| Annual average daily maximum temperature (Celsius)               | PC      | DA (6,657)               | 7 | Continuous | 10.2 (1.4)  | -4.0  | 11.7 |
| Annual average daily minimum temperature (Celsius)               | PC      | DA (6,657)               | 7 | Continuous | 0.4 (1.4)   | -10.3 | 2.7  |
| Annual number of rain events                                     | PC      | DA (6,657)               | 7 | Discrete   | 108.7 (6.8) | 40    | 125  |
| Annual average amount of rain per event (mm)                     | PC      | DA (6,657)               | 7 | Continuous | 14.9 (2.4)  | 4.9   | 22.9 |
| Annual average length of rain events (days)                      | PC      | DA (6,657)               | 7 | Continuous | 2.6 (0.2)   | 2.1   | 4.7  |
| Annual number of snow events                                     | PC      | DA (6,657)               | 7 | Discrete   | 70.8 (13.2) | 59    | 208  |

|                                                                  |    |                          |        |            |                         |     |              |
|------------------------------------------------------------------|----|--------------------------|--------|------------|-------------------------|-----|--------------|
| Annual average amount of snow per event (mm)                     | PC | DA (6,657)               | 7      | Continuous | 9.8 (1.1)               | 3.7 | 13.1         |
| Annual number of heat event starts based on maximum temperature  | PC | DA (6,657)               | 7      | Discrete   | 1.2 (0.5)               | 0   | 4            |
| Annual number of frost days (min temp < 0) (days)                | PC | DA (6,657)               | 7      | Discrete   | 205.4 (16.0)            | 94  | 230          |
| <b>e240 - Light</b>                                              |    |                          |        |            |                         |     |              |
| Annual mean nighttime brightness                                 | PC | DA (6,655)               | 8      | Continuous | 53.1 (15.4)             | 0.0 | 63.0         |
| <b>SERVICES, SYSTEMS AND POLICIES</b>                            |    |                          |        |            |                         |     |              |
| <b>e520 - Open space planning services, systems and policies</b> |    |                          |        |            |                         |     |              |
| <b>e540 - Transportation services, systems and policies</b>      |    |                          |        |            |                         |     |              |
| Roads (km)                                                       | DA | DA (13,634); CSD (1,320) | 9      | Continuous | 20.4 (123.3)            | 0.0 | 4,172.0      |
| Ridership (public transit) / Pop65*1000                          | TC | CSD (492)                | 10, 15 | Continuous | 700.1 (3,599.4)         | 0.0 | 60,247.2     |
| Kilometers served (public transit) / roads (km)                  | TC | CSD (248)                | 10, 15 | Continuous | 3,876.8 (20,010.8)      | 0.2 | 241,998.5    |
| Kilometers traveled annually (public transit) / roads (km)       | TC | CSD (329)                | 10, 15 | Continuous | 467,679.7 (1,193,467.0) | 0.0 | 12,726,308.0 |
| Seniors' reduced fare (public transit)                           | TC | CSD (372)                | 10, 15 | Binary     | 0.2 (0.4)               | 0   | 1            |
| Ridership (paratransit) / Pop65*1000                             | TC | CSD (1,029)              | 10, 14 | Continuous | 7.8 (35.2)              | 0.0 | 793.1        |
| Kilometers traveled (paratransit) / roads (km)                   | TC | CSD (994)                | 10, 14 | Continuous | 29,121.0 (93,751.0)     | 1.2 | 1,686,834.0  |
| Fleet size (paratransit) / Pop65                                 | TC | CSD (1,029)              | 10, 14 | Continuous | 1.1 (3.6)               | 0.0 | 63.5         |
| Road intersection density                                        | DA | DA (13,776)              | 11     | Continuous | 46.0 (27.6)             | 0.0 | 127.0        |
| Senior vehicle owners (%)                                        | DA | DA (13,041)              | 12     | Continuous | 53.2 (0.2)              | 0.0 | 100.0        |

|                                                               |    |                          |    |            |             |      |       |
|---------------------------------------------------------------|----|--------------------------|----|------------|-------------|------|-------|
| Seniors with a driver's or probationary license               | DA | DA (13,105)              | 12 | Continuous | 71.6 (0.2)  | 4.3  | 100.0 |
| <b>e535 - Communication services, systems and policies</b>    |    |                          |    |            |             |      |       |
| Post offices <sup>b</sup>                                     | DA | DA (13,776); CSD (1,320) | 2  | Discrete   | 0.2 (0.4)   | 0    | 9     |
| <b>e545 - Civil protection services, systems and policies</b> |    |                          |    |            |             |      |       |
| Non-violent Crime Severity Index [2]                          | PS | CSD (1,284)              | 13 | Continuous | 82.9 (22.1) | 20.7 | 335.2 |
| Violent Crime Severity Index [2]                              | PS | CSD (1,284)              | 13 | Continuous | 81.3 (46.4) | 12.5 | 878.5 |
| <b>e580 - Health services, systems and policies</b>           |    |                          |    |            |             |      |       |
| Medical clinics <sup>b</sup>                                  | DA | DA (13,776); CSD (1,320) | 2  | Discrete   | 0.1 (0.3)   | 0    | 13    |
| Dentist offices <sup>b</sup>                                  | DA | DA (13,776); CSD (1,320) | 2  | Discrete   | 0.2 (0.8)   | 0    | 40    |

DA: Dissemination area; CSD: Census subdivision; TC: Transit corporation; PS: Police service; PC: Postal code

1. *Société d'habitation du Québec* (2008); 2. DMTI Enhanced Points of Interest (2010); 3. Ministry of Municipal Affairs and Land Occupancy (2013); 4. Canadian Census (2006); 5. *Institut national de santé publique du Québec* (2011); 6. Landsat Normalized Difference Vegetation Index (2009); 7. Canadian Forest Service, Natural Resources Canada (2009); 8. DMSP-OLS Nighttime Lights Time Series (2009); 9. DMTI Route Logistics (2010); 10. Transportation survey (2016); 11. Property assessment (2012); 12. *Société de l'assurance automobile du Québec* (2016); 13. Uniform Crime Reporting Survey (2008); 14. Paratransit statistical directory, Ministry of Transport, Sustainable Mobility and Transport Electrification (2015); 15. Activity report (2009) and bus and metro networks (2015), Montreal Transit Corporation.

1. Pampalon, R.; Hamel, D.; Gamache, P., Health inequalities in urban and rural Canada: Comparing inequalities in survival according to an individual and area-based deprivation index. *Health Place* **2010**, *16*, (2), 416-420.
2. Statistics Canada, Uniform Crime Reporting Survey. In Minister of Industry, Ed. Ottawa, Ontario, Canada, 2008.
